# Supplementary material for: Differential Age-Dependent Import Regulation by Signal Peptides
Source: PubMed Central journal article supplement (PMC3484058; doi:10.1371/journal.pbio.1001416), 2012-10-30

Supplementary Information Figure S3

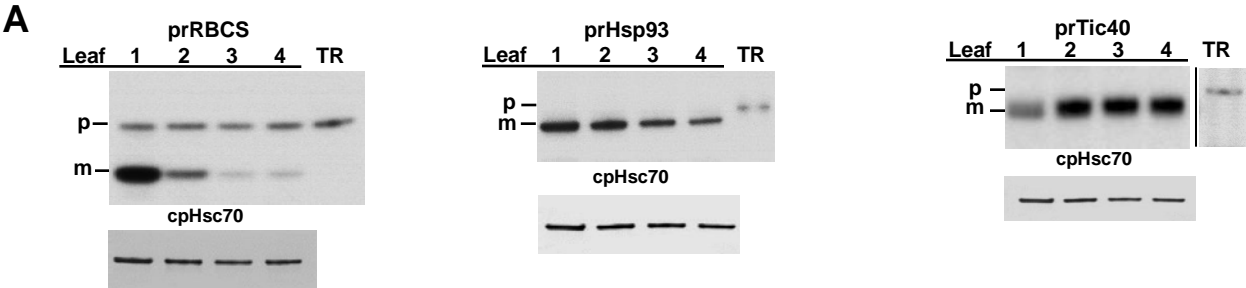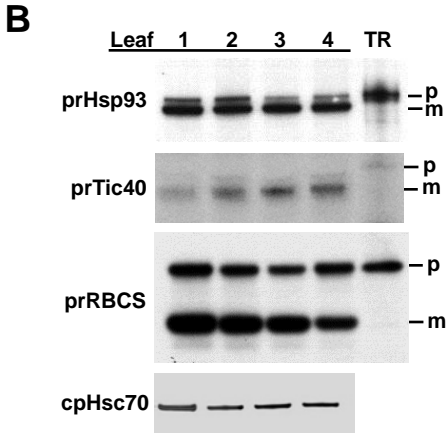

Supplement: pbio.1001416.s003.pdf [file pbio.1001416.s003.pdf]
