# Supplementary material for: Differential Age-Dependent Import Regulation by Signal Peptides
Source: PubMed Central journal article supplement (PMC3484058; doi:10.1371/journal.pbio.1001416), 2012-10-30

# Supplementary Information Figure S5

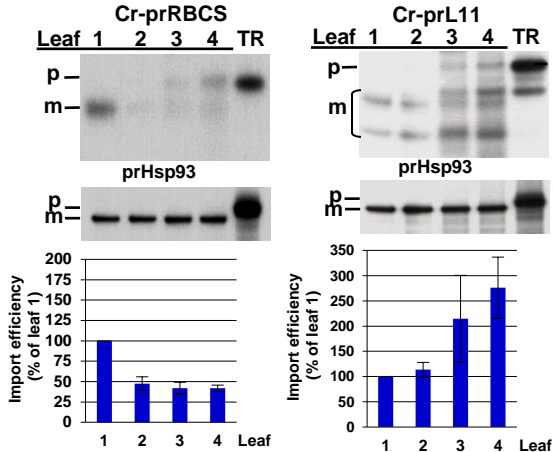

Supplement: pbio.1001416.s005.pdf [file pbio.1001416.s005.pdf]
