# Supplementary material for: Differential Age-Dependent Import Regulation by Signal Peptides
Source: PubMed Central journal article supplement (PMC3484058; doi:10.1371/journal.pbio.1001416), 2012-10-30

## Supplementary Information Figure S6

**A**

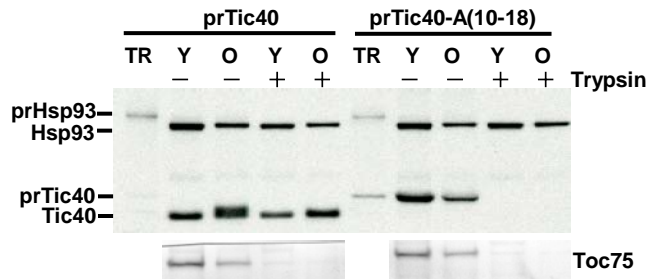

**B**

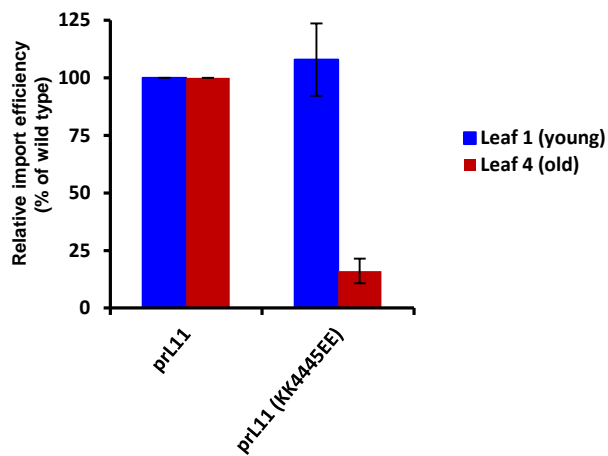

Supplement: pbio.1001416.s006.pdf [file pbio.1001416.s006.pdf]
